# Supplementary material
Source: PubMed Central journal article supplement (PMC4715551)
Supplement: NIHMS716966-supplement-Supp_APPENDIX.pdf [file NIHMS716966-supplement-Supp_APPENDIX.pdf]

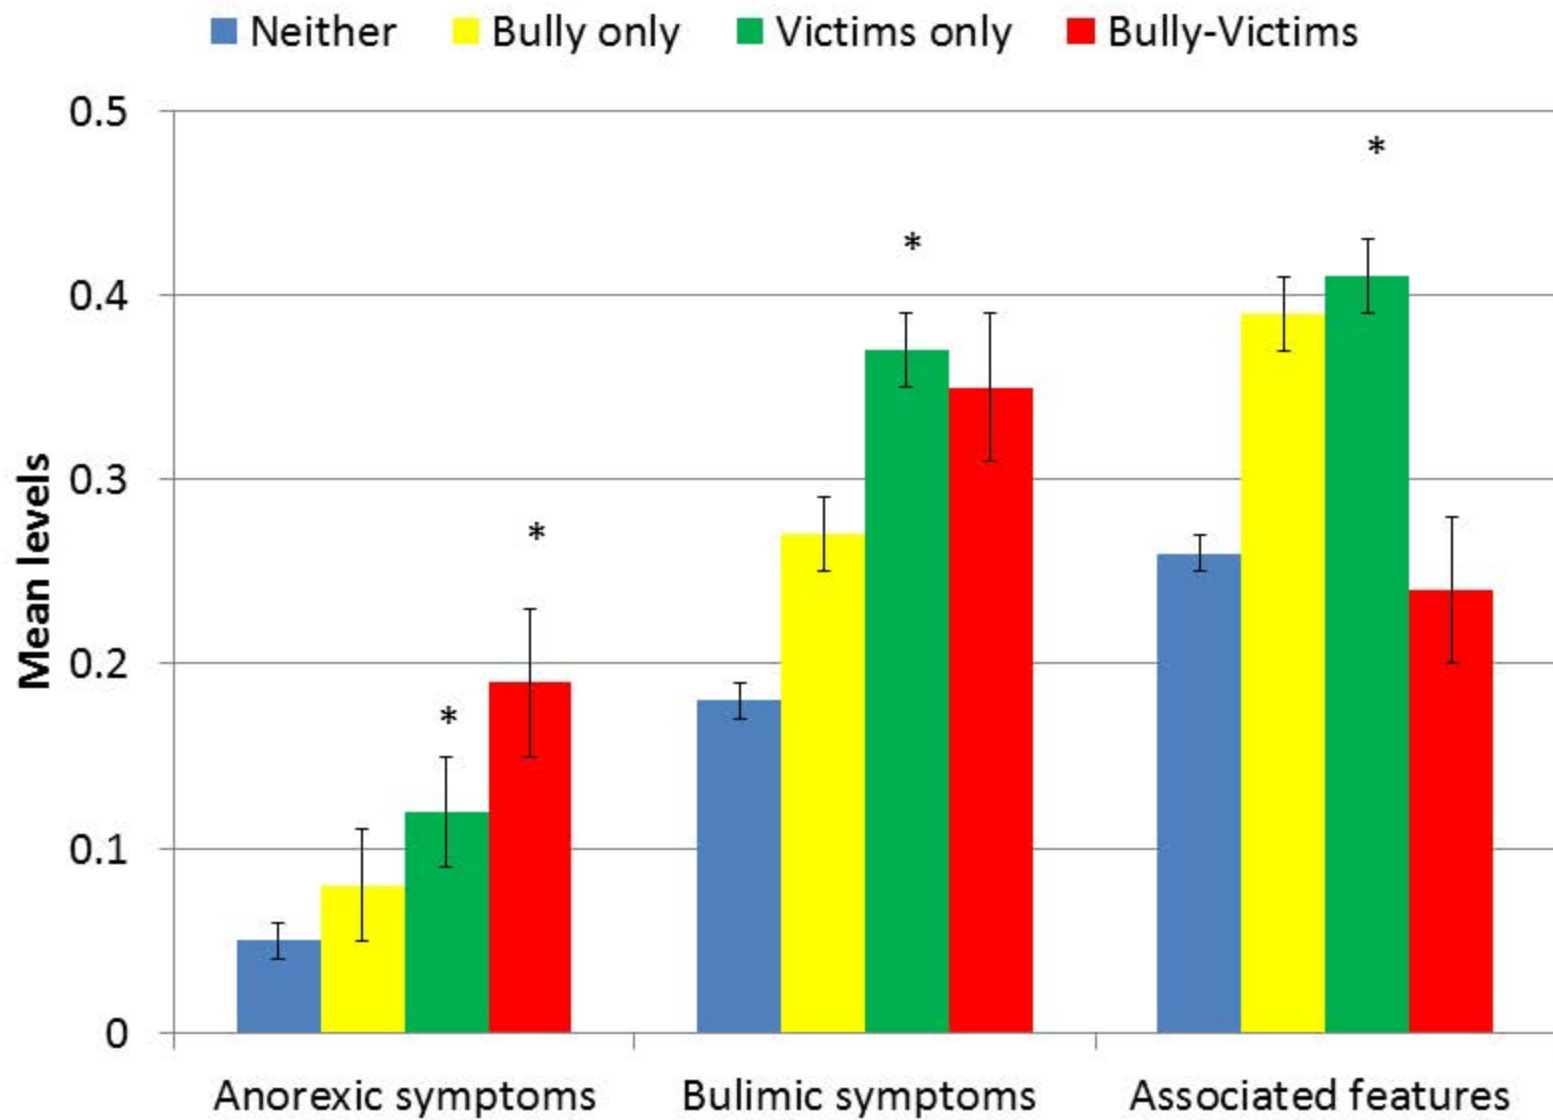

| Supplemental table 1. Definitions and interview probes for Bullying and Being Bullied |                                                      |                                    |                                                                                                                                                                                         |                                                                                                                                                                                                                                                                                                                                                |
|---------------------------------------------------------------------------------------|------------------------------------------------------|------------------------------------|-----------------------------------------------------------------------------------------------------------------------------------------------------------------------------------------|------------------------------------------------------------------------------------------------------------------------------------------------------------------------------------------------------------------------------------------------------------------------------------------------------------------------------------------------|
| Variable                                                                              | How assessed?                                        | How often?                         | Definition                                                                                                                                                                              | Interview Questions*                                                                                                                                                                                                                                                                                                                           |
| <b>Being bullied/teased</b>                                                           | Structured interview with the child and their parent | 4 to 6 times between ages 9 and 16 | Child is a particular object of mockery, physical attacks or threats by peers or siblings.                                                                                              | <p><b>Do you get teased or bullied at all by your siblings or friends/peers?</b></p> <p><b>Is that more than other children?</b></p> <p><b>Are other boys and girls mean to you?</b></p>                                                                                                                                                       |
| <b>Bullying</b>                                                                       | Structured interview with the child and their parent | 4 to 6 times between ages 9 and 16 | Child engages in deliberate actions aimed at causing distress to another or attempts to force another to do something against his/her will by using threats, violence, or intimidation. | <p><b>Do you ever do things to upset other people on purpose or try to hurt them on purpose?</b></p> <p><b>Do you ever try to get other people into trouble on purpose?</b></p> <p><b>Have you ever forced someone to do something s/he didn't want to do by threatening or hurting him/her?</b></p> <p><b>Do you ever pick on anyone?</b></p> |

\*Interviewer begins with standard questions, but may ask additional questions to ensure that the definition is met in full. Furthermore, interviewer asks who the perpetrator was (sibling or peers). Only peer bullying coded for this study. Frequency within the past 3 months and onset of bullying involvement were also assessed.

| Supplemental table 2. Definitions for family hardship variables and their indicators                                        |                                                                                                       |
|-----------------------------------------------------------------------------------------------------------------------------|-------------------------------------------------------------------------------------------------------|
| <a href="http://www.ncparks.gov/Visit/parks/jord/facilities.php">http://www.ncparks.gov/Visit/parks/jord/facilities.php</a> | Definition                                                                                            |
| <b>Low SES</b>                                                                                                              | Positive if child's family met 2 or more of the indicators                                            |
| Family Poverty                                                                                                              | Meets the federal guidelines for poverty based on income and family size                              |
| Low parental educational attainment                                                                                         | At least one did not graduate from high school                                                        |
| Low parental occupational prestige                                                                                          | Highest parental prestige in lowest 25% of occupations based on NORC/GSS Occupational Prestige Scale. |
| <b>Unstable family structure</b>                                                                                            | Positive if child's family met 2 or more of the indicators                                            |
| Single parent family                                                                                                        | Self-explanatory                                                                                      |
| Recent parental separation/divorce                                                                                          | Self-explanatory                                                                                      |
| Presence of step-parent                                                                                                     | Self-explanatory                                                                                      |
| Change in family structure                                                                                                  | Self-explanatory                                                                                      |
| <b>Family dysfunction</b>                                                                                                   | Positive if child's family met 5 or more of the indicators                                            |
| Inadequate parental supervision                                                                                             | Parents do not exert age-appropriate control over child's activities or friends                       |
| Parental overinvolvement                                                                                                    | Parent involved into the child's activities in an age-inappropriate manner                            |
| Interparental violence                                                                                                      | Physical violence between parents                                                                     |
| Maternal depression                                                                                                         | Mother scored 9 or higher on the Short Mood and Feelings Questionnaire                                |
| High parental conflict                                                                                                      | Top 20% of reported arguments between parents                                                         |

|                                      |                                                                                                                                                                    |
|--------------------------------------|--------------------------------------------------------------------------------------------------------------------------------------------------------------------|
| Poor marital relationship            | Marital relationship is characterized by absence of affection, apathy or indifference.                                                                             |
| Child involved in parent's arguments | Child is upset by or actively involved in arguments between parents                                                                                                |
| High parent-child arguments          | Top 20% of reported arguments between a parent and the child                                                                                                       |
| Poor parent-child relations          | Many parent-child activities involve tension, worry or disinterest in the child                                                                                    |
| <b>Maltreatment</b>                  | Positive if any of the indicators below endorsed                                                                                                                   |
| Physical Abuse                       | Subject victim of intentional physical violence by family member                                                                                                   |
| Sexual Abuse                         | Subject involved in activities for purposes of perpetrators sexual gratification including kissing, fondling, oral-genital, oral-anal, genital or anal intercourse |
| Parental neglect                     | Caregiver unable to meet child's need for food, clothing, housing, transportation, medical attention or safety                                                     |

Codebooks for all items available at <http://devepi.duhs.duke.edu/codebooks.html>

| Supplemental table 3. Tests of anxiety symptoms as a mediator of the association between bullying groups and eating disorder symptoms/features |                   |                           |                        |                         |               |
|------------------------------------------------------------------------------------------------------------------------------------------------|-------------------|---------------------------|------------------------|-------------------------|---------------|
|                                                                                                                                                |                   | 1. Predictors to mediator | 2. Mediator to outcome | 3. Predictor to Outcome | 4. Sobel test |
| Predictor                                                                                                                                      | Outcome           | $\beta$ (SE)              | $\beta$ (SE)           | $\beta$ (SE)            | $p$           |
| Victim                                                                                                                                         | Anorexic symptoms | 0.68 (0.11)§              | 0.14 (0.02)§           | 0.38 (0.23)             | <0.001        |
| Victim                                                                                                                                         | Bulimic symptoms  | 0.68 (0.11)§              | 0.07 (0.02)§           | 0.35 (0.13)‡            | 0.002         |
| Victim                                                                                                                                         | Ass. Features     | 0.68 (0.11)§              | 0.08 (0.01)§           | 0.30 (0.08)‡            | <0.001        |
| Bullies                                                                                                                                        | Bulimic symptoms  | 0.60 (0.17)§              | 0.07 (0.02)§           | 0.42 (0.28)             | 0.01          |
| Bullies                                                                                                                                        | Ass. Features     | 0.60 (0.17)§              | 0.47 (0.03)            | 0.27 (0.14)†            | <0.001        |
| Bully-victims                                                                                                                                  | Anorexic symptoms | 1.40 (0.16)§              | 0.14 (0.02)§           | 0.76 (0.50)             | <0.001        |

Models were tested with Poisson<sup>a</sup> regression. Columns numbered 2 and 3 provide results from models in which both predictor and potential mediator predicted eating outcome status. Models adjusted for demographics, prior levels of eating symptoms/features, prior psychiatric status and family adversities. Sobel test assess significance of indirect pathway.

†  $P \leq 0.05$ ; ‡  $P \leq 0.01$ ; §  $P \leq 0.0001$ .
